# Supplementary material for: Function and evolution of Magnaporthe oryzae avirulence gene AvrPib responding to the rice blast resistance gene Pib
Source: PubMed Central journal article supplement (PMC5387869; doi:10.1038/srep11642), 2015-06-25
Supplement: srep11642-s1.pdf [file srep11642-s1.pdf]

**Molecular mechanisms underlying the function of *Magnaporthe oryzae* AvrPib as revealed by population genetic, comparative genomic and mutagenic approaches**

**Shulin Zhang, Ling Wang, Weihuai Wu, Liyun He, Xianfeng Yang, and Qinghua Pan**

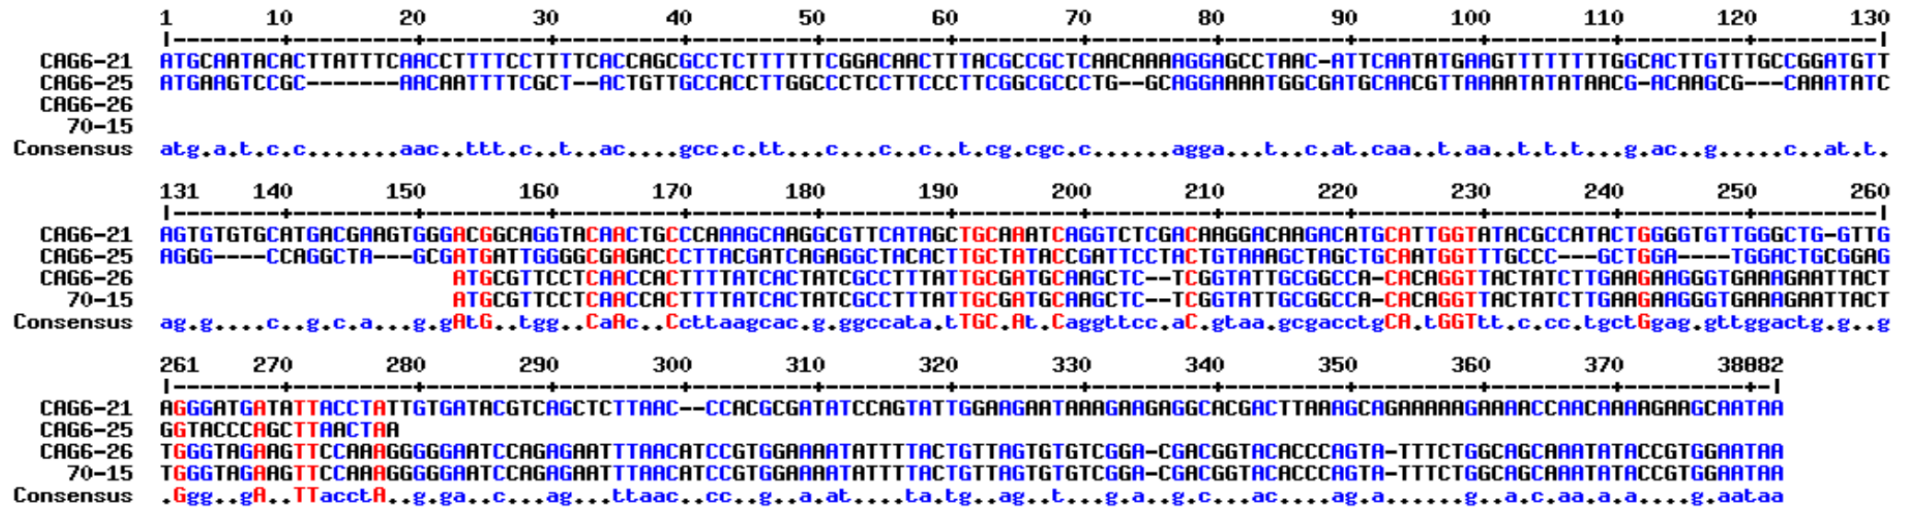

Figure S1 Alignment of the CDSs of three candidate *AvrPib* genes.

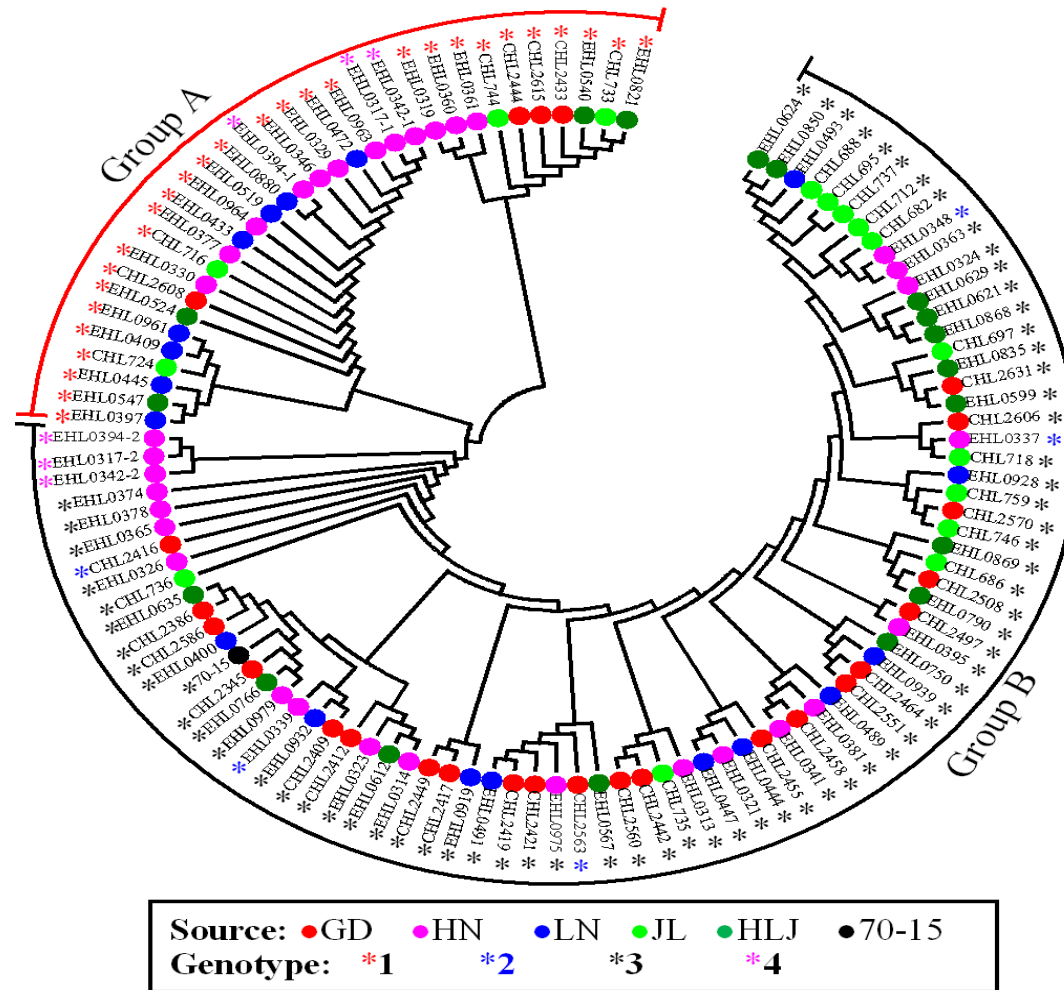

**Figure S2** MEGA6-based phylogenetic analysis of 108 *Mo* isolates, based on the sequences of the gene fragment between positions -710 and +530. The two fragments harbored by isolates of genotype 4 are numbered with the suffix -1 and -2.

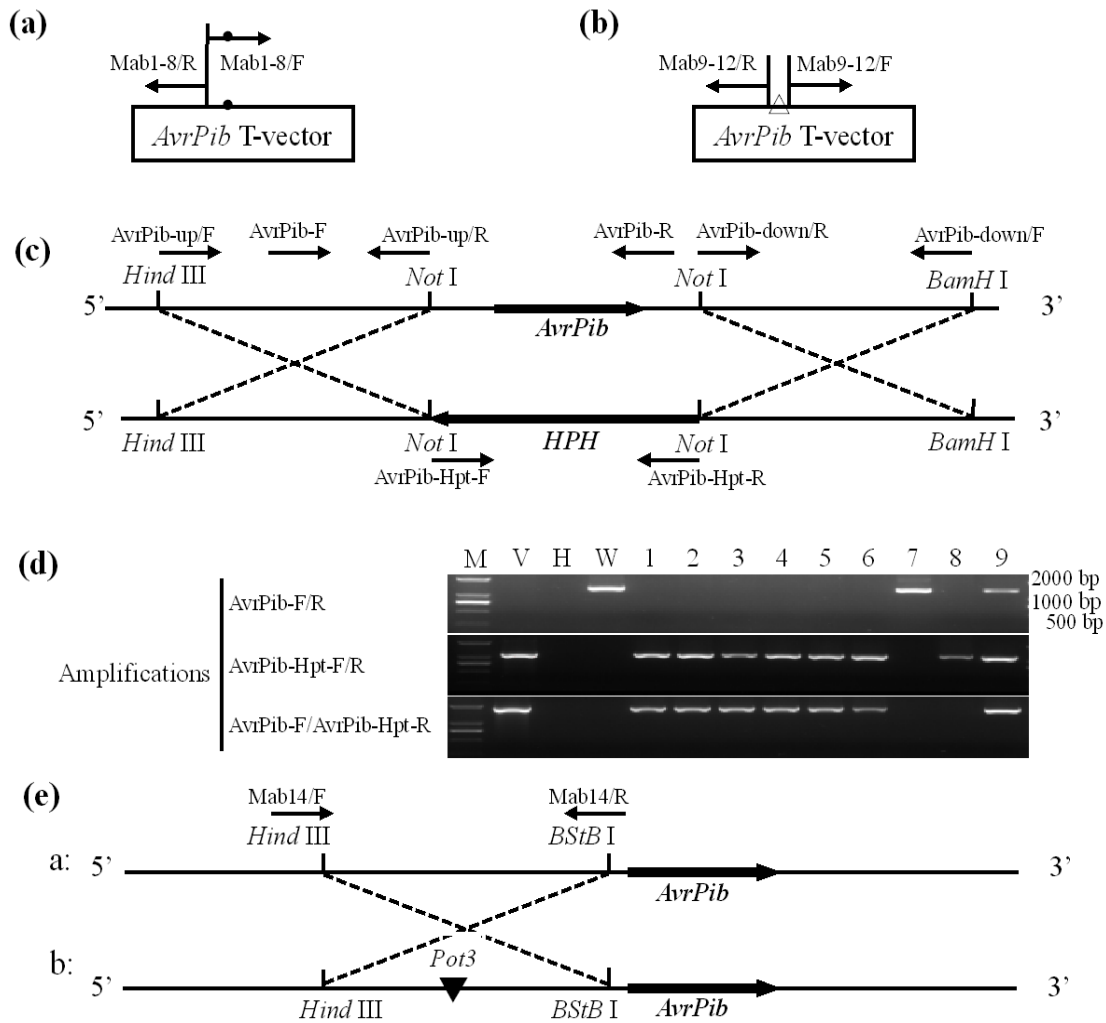

**Figure S3** The reconstruction of *AvrPib* alleles. (a) Targeted nucleotide variant(s) incorporated in the forward primer, with the T-plasmid harboring *AvrPib* used as the template for generating alleles Mab1 through Mab8. (b) Site-directed deletion used to generate alleles Mab9 through Mab12; the targeted nucleotides were omitted from each primer, with the T-plasmid harboring *AvrPib* used as the template. (c) *AvrPib*-directed replacement mutation used to generate the Mab13 allele, in which *AvrPib* was replaced by an *Hpt* cassette. (d) Triple PCR-based confirmation of gene replacement mutants. Amplification based on the three primer pairs *AvrPib*-F/R, *AvrPib*-Hpt-F/R, and *AvrPib*-F/*AvrPib*-Hpt-R (as indicated in (c)) showed that #1 through #6 were genuine mutants, while #7 through #9 were incorrect. (e) Domain swapping based on the *Pot3* transposon used to generate the Mab14 allele, in which the *Pot3* sequence in CHL724 was introduced into the 5' sequence of CHL42. Appropriate restriction enzyme recognition sites indicated. M: size marker, V: vector (positive control), H: H<sub>2</sub>O (negative control), W: isolate CHL42.

**Table S1 PCR primer sequences used in the study**

| Primer name | Forward primer                    | Enzyme site | Reverse primer                      | Enzyme site | Use of primers      |
|-------------|-----------------------------------|-------------|-------------------------------------|-------------|---------------------|
| MS6-24      | GCGAGTTTACAGGTTTAGCA              |             | TTTGGGGCTAATAACAGACC                |             | <b>Gene mapping</b> |
| MS6-3       | CCACATCGCAGCCTCACTTG              |             | CCAGTCGGTTCCAGGTCTTG                |             |                     |
| MS6-17      | CAAGAATGCAGAGAACCACAG             |             | GTTTTCCGCTGTGTAATAGA                |             |                     |
| MS6-7       | CCAAGGCACCAGCACAGACC              |             | CAGAAGATGCCTCGGAGATC                |             |                     |
| MS6-10      | CAACATGTGGTGTCTGATCC              |             | GCAGGGCCCACTACACATGT                |             |                     |
| CAG6-23     | TGCGTTGTGGCGGTAGTCA               |             | GTTTGTCTGGTCAGCGTCAC                |             |                     |
| MS3-5       | GAGTTTGAGACCTTGCGATT              |             | GGCGGCAAGTCGCTGAAGG                 |             |                     |
| MS6-34      | CGGATGATGGATGAATTGGC              |             | AGTGCCGATGCTCCAGAAT                 |             |                     |
| CAG6-21     | ACCTCGCATTGTCCGCATTC              |             | TACACCGAGGAACTTGCTTGG               |             |                     |
| CAG6-26     | GGACAAGGGAGGCAAATCTAAC            |             | ATGCCGACAATGCGAGGTAT                |             |                     |
| CAG6-25     | ATGCGATTCTGCGTTGCTA               |             | CCGAGATACAAAACGCTACCCCT             |             |                     |
| MS3-26      | GAAGGCGACAAGTGGCAGT               |             | CTCGTCTGGTATCAGTTGCC                |             |                     |
| MS3-6.16    | CGAATATGCAAATGTAAGTT              |             | GAGTACTTGCCAGAGAGAA                 |             |                     |
| MS3-6.15    | ATTTCGGTTGATCGTGTGG               |             | GCCACCTGTTTCTCAA                    |             |                     |
| MS3-6.13    | CCCAAGGTAGGTACGAGAAA              |             | TTTCTACTGCCAGACAAG                  |             | <b>Gene cloning</b> |
| b1          | TTGGCGCGCCCGTTTGGTTACGTTACCCCTTG  | <i>AseI</i> | TAGGCGCGCCTCGACTACATCCCCATGACGC     | <i>AseI</i> |                     |
| b2          | TTGGCGCGCCGCCATCAACGAGACCACAGCCAC | <i>AseI</i> | TTGGCGCGCCACTGCGGGAATGCCGACAATGCGAG | <i>AseI</i> |                     |
| b3          | ATGGCGCGCCGGAGAATGAGCTGCGAGGTC    | <i>AseI</i> | TAGGCGCGCCACTGCGGGAATGCCGACAATGCGAG | <i>AseI</i> | <b>Genotyping</b>   |
| AvrPibF1/R1 | GGACAAGGGAGGCAAATCTAAC            |             | ATGCCGACAATGCGAGGTAT                |             |                     |
| AvrPibF2/R2 | TGGAGAAGACTTTGATGC                |             | GAACGCATAATGGCAACTA                 |             |                     |
|             |                                   |             |                                     |             | <b>Mutations</b>    |
| Mab-1       | TTTTGCGATGCAAGCTCTCGGTAT          |             | AAGGCGATAGTGATAAAAAGTGG             |             |                     |
| Mab-2       | TCTTGCGATGCAAGCTCTCGGTAT          |             | AAGGCGATAGTGATAAAAAGTGG             |             |                     |
| Mab-3       | TAGTGCATGCAAGCTCTCGGTAT           |             | AAGGCGATAGTGATAAAAAGTGG             |             |                     |
| Mab-4       | TTTATCACTATCGCCTTACTGC            |             | AGTGGTTGAGGAACGCATAAT               |             |                     |
| Mab-5       | CTTTTGTGCGATGCAAGCTCT             |             | GCGATAGTGATAAAAAGTGTT               |             |                     |

|             |                                          |                 |                                          |                |                               |
|-------------|------------------------------------------|-----------------|------------------------------------------|----------------|-------------------------------|
| Mab-6       | TTTTATCACTATCGCCTTT <b>T</b> CTGC        |                 | GTGGTTGAGGAACGCATAAT                     |                |                               |
| Mab-7       | CTTTCGTGCGATGCAAGCTCT                    |                 | GCGATAGTGATAAAAAGTGGTT                   |                |                               |
| Mab-8       | CTTTCCTGCGATGCAAGCTCT                    |                 | GCGATAGTGATAAAAAGTGGTT                   |                |                               |
| Mab-9       | TTTTATCACTATCGCCTTT <b>TG</b> C          |                 | GTGGTTGAGGAACGCATAAT                     |                |                               |
| Mab-10      | ATTGCGATGCAAGCTCTCGGTATT                 |                 | AATGGCAACTAATTTAATTGTATA                 |                |                               |
| Mab-11      | ACACAGGTTACTATCTTGAA                     |                 | AATAAAGGCGATAGTGATAAAAAGTGG              |                |                               |
| Mab-12      | ACACAGGTTACTATCTTGAAGAAGGGT              |                 | AATGGCAACTAATTTAATTGTATA                 |                |                               |
| Mab15       | TATTTTACTA <b>T</b> TAGTGTGTCGGAC        |                 | TTTCCACGGATGTTAAATTCTCT                  |                |                               |
| Mab16       | GAATCCAGAAAATTTAACA <b>T</b> CCGTG       |                 | CCCCTTTGGA <b>A</b> CTTCTACC             |                |                               |
|             |                                          |                 |                                          |                | <b>Gene knock out (Mab13)</b> |
| AvrPib-up   | GCAGCGGCCCGCAGACTCAAAGTCCATAGC           | <i>NotI</i>     | CAT <b>AAGCTT</b> AAACAAGGGATGCTGACTAC   | <i>HindIII</i> |                               |
| AvrPib-down | GCAG <b>GATCC</b> GTTAGTACCTACAGCTACAAG  | <i>BamHI</i>    | GCAGCGGCCCGCGCTGGATGGTTATTGCGAT          | <i>NotI</i>    |                               |
| AvrPib-Hpt  | GCAGCGGCCCGCTATTGAAGGAGCA <b>TTTTTGG</b> | <i>NotI</i>     | GTAGCGGCCCGCGCTCTTGTTCGGT <b>CGGCATC</b> | <i>NotI</i>    |                               |
| AvrPib      | GGACAAGGGAGGCAAATCTAAC                   |                 | ATACCTCGCATTGTCGGCAT                     |                |                               |
|             |                                          |                 |                                          |                | <b>Pot3 domain-swapping</b>   |
| Mab14       | TT <b>AAGCTT</b> AGACTGGCGTCGTGACTGGA    | <i>Hind III</i> | GAACGCATAATGGCAACTA                      | <i>BstB I</i>  |                               |
|             |                                          |                 |                                          |                | <b>qPCR analysis</b>          |
| Pot2        | ACGACCCGTCTTACTTATTTGG                   |                 | AAGTACGCTTGGTTTTGTTGGAT                  |                |                               |
| ubiquitin   | AACCAGCTGAGGCCCAAGA                      |                 | ACGATTGATTTAACCAGTCCATGA                 |                |                               |
|             |                                          |                 |                                          |                | <b>RT-PCR analysis</b>        |
| Actin       | GCGGTTACACCTCTCTACCAC                    |                 | AGTCTGGATCTCCTGCTCAAAG                   |                |                               |
| RT-AvrPib   | GGGTAGAAGTTCAAAGGGG                      |                 | TCCACGGTATATTGCTGCCA                     |                |                               |

Note: Sequences underlined indicate restrict sites for plasmid constructions, and those boldfaced indicate mutation sites.

**Table S2** Details of the 300 *Mo* isolates collected from five provinces of China, and the 12 chosen isolates, which are pathogenic on grass species other than rice

| Isolate                                    | Growing area <sup>a</sup> | Sampled cultivar       | Sampled county   | Sampled time <sup>b</sup> | <i>Pib</i> -infection type | Genotype <sup>c</sup> |                     |            | Mutation in CDS <sup>d</sup>           | <i>AvrPib</i> resequencing <sup>e</sup> |
|--------------------------------------------|---------------------------|------------------------|------------------|---------------------------|----------------------------|-----------------------|---------------------|------------|----------------------------------------|-----------------------------------------|
|                                            |                           |                        |                  |                           |                            | <i>AvrPib</i> F1/R1   | <i>AvrPib</i> F2/R2 | Integrated |                                        |                                         |
| <b>Guangdong (GD) population (V/3: 13)</b> |                           |                        |                  |                           |                            |                       |                     |            | <b>26</b>                              |                                         |
| CHL2345                                    | GD I                      | Mabayinzhan            | Qujiang          | 2008E                     | A                          | 3                     | 3                   | 3          |                                        | ✓                                       |
| CHL2357                                    | GD I                      | Shanyou 428            | Wengyuan         | 2008E                     | V                          | 1                     | 1                   | 1          |                                        |                                         |
| CHL2370                                    | GD II                     | Jinshanyou 3182        | Longchuan        | 2008E                     | V                          | 1                     | 0                   | 1          |                                        |                                         |
| CHL2375                                    | GD I                      | Shanyou 253            | Renhua           | 2008E                     | V                          | 1                     | 1                   | 1          |                                        |                                         |
| CHL2384                                    | GD I                      | Changguidao            | Lianping         | 2008E                     | V                          | 0                     | 1                   | 1          |                                        |                                         |
| <b>CHL2386</b>                             | <b>GD II</b>              | <b>Fengsimiao</b>      | <b>Gaoyao</b>    | <b>2008E</b>              | <b>V</b>                   | <b>3</b>              | <b>3</b>            | <b>3</b>   | <b>D<sup>37-38</sup>, A137G (E46G)</b> | <b>✓</b>                                |
| CHL2387                                    | GD II                     | Shanyou 428            | Meixian          | 2008E                     | V                          | 0                     | 1                   | 1          |                                        |                                         |
| CHL2394                                    | GD II                     | Nuo                    | Meixian          | 2008E                     | V                          | 0                     | 0                   | 0          |                                        |                                         |
| CHL2401                                    | GD II                     | Huayougui 99           | Wuhua            | 2008E                     | V                          | 1                     | 0                   | 1          |                                        |                                         |
| <b>CHL2409</b>                             | <b>GD II</b>              | <b>Zhongerruanzhan</b> | <b>Longmen</b>   | <b>2008E</b>              | <b>V</b>                   | <b>3</b>              | <b>3</b>            | <b>3</b>   | <b>D<sup>37-38</sup></b>               | <b>✓</b>                                |
| <b>CHL2412</b>                             | <b>GD II</b>              | <b>Shanyougui 99</b>   | <b>Fengkai</b>   | <b>2008E</b>              | <b>V</b>                   | <b>3</b>              | <b>3</b>            | <b>3</b>   | <b>D<sup>37-38</sup></b>               | <b>✓</b>                                |
| CHL2416                                    | GD II                     | Meixiangzhan           | Xinxing          | 2008E                     | V                          | 2                     | 2                   | 2          |                                        | ✓                                       |
| <b>CHL2417</b>                             | <b>GD II</b>              | <b>Tianyou 290</b>     | <b>Xingning</b>  | <b>2008E</b>              | <b>MV</b>                  | <b>0</b>              | <b>3</b>            | <b>3</b>   | <b>T38G (I13S), G166A (V56I)</b>       | <b>✓</b>                                |
| <b>CHL2419</b>                             | <b>GD II</b>              | <b>Changguidao</b>     | <b>Jiexi</b>     | <b>2008E</b>              | <b>V</b>                   | <b>3</b>              | <b>3</b>            | <b>3</b>   | <b>D<sup>37-38</sup></b>               | <b>✓</b>                                |
| <b>CHL2421</b>                             | <b>GD III</b>             | <b>Sanyinian</b>       | <b>Yangjiang</b> | <b>2008E</b>              | <b>V</b>                   | <b>3</b>              | <b>3</b>            | <b>3</b>   | <b>D<sup>37-38</sup></b>               | <b>✓</b>                                |
| CHL2426                                    | GD III                    | Youyou 389             | Xinyi            | 2008E                     | V                          | 0                     | 1                   | 1          |                                        |                                         |
| CHL2433                                    | GD III                    | Huayou 86              | Xinyi            | 2008E                     | V                          | 1                     | 1                   | 1          |                                        | ✓                                       |
| CHL2436                                    | GD III                    | Huayou 86              | Xinyi            | 2008E                     | V                          | 0                     | 1                   | 1          |                                        |                                         |
| CHL2438                                    | GD III                    | Changguidao            | Gaozhou          | 2008E                     | V                          | 0                     | 0                   | 0          |                                        |                                         |
| CHL2441                                    | GD III                    | Zajiaodao              | Gaozhou          | 2008E                     | V                          | 1                     | 1                   | 1          |                                        |                                         |
| CHL2442                                    | GD III                    | Tianyou 998            | Haifeng          | 2008E                     | A                          | 3                     | 3                   | 3          |                                        | ✓                                       |
| CHL2444                                    | GD III                    | Guangyinzhhan          | Foshan           | 2008E                     | V                          | 1                     | 0                   | 1          |                                        | ✓                                       |
| CHL2446                                    | GD III                    | Shuanghuangzhan        | Jiedong          | 2008E                     | V                          | 1                     | 1                   | 1          |                                        |                                         |

|         |        |               |           |       |   |   |   |   |                    |   |
|---------|--------|---------------|-----------|-------|---|---|---|---|--------------------|---|
| CHL2448 | GD III | Teyou 721     | Chaoan    | 2008E | V | 1 | 1 | 1 |                    |   |
| CHL2449 | GD II  | Zengyouzhan   | Zengcheng | 2008E | V | 3 | 3 | 3 | D <sup>37-38</sup> | ✓ |
| CHL2452 | GD III | Fengqin       | Lianjiang | 2008E | V | 1 | 1 | 1 |                    |   |
| CHL2455 | GD III | Bairizao      | Huidong   | 2008E | V | 3 | 3 | 3 | D <sup>37-38</sup> | ✓ |
| CHL2457 | GD III | Zhanyou 226   | Huidong   | 2008E | V | 1 | 1 | 1 |                    |   |
| CHL2458 | GD III | Teyou 721     | Yangchun  | 2008E | V | 3 | 3 | 3 | D <sup>37-38</sup> | ✓ |
| CHL2464 | GD III | Taishanbai    | Kaiping   | 2008E | A | 3 | 3 | 3 |                    | ✓ |
| CHL2467 | GD I   | Meixiangzhan  | Renhua    | 2008L | V | 2 | 2 | 2 |                    |   |
| CHL2486 | GD I   | Fengyou 998   | Lechang   | 2008L | V | 1 | 1 | 1 |                    |   |
| CHL2490 | GD I   | Guodao No.1   | Ruyuan    | 2008L | V | 1 | 1 | 1 |                    |   |
| CHL2492 | GD I   | Yueyou 360    | Nanxiong  | 2008L | V | 0 | 0 | 0 |                    |   |
| CHL2497 | GD I   | Meixiangzhan  | Qujiang   | 2008L | A | 3 | 3 | 3 |                    | ✓ |
| CHL2508 | GD I   | Youyou 308    | Wengyuan  | 2008L | V | 3 | 3 | 3 | D <sup>37-38</sup> | ✓ |
| CHL2509 | GD I   | Shanyou 89    | Pingyuan  | 2008L | V | 1 | 1 | 1 |                    |   |
| CHL2513 | GD I   | Shanyou 46    | Xinfeng   | 2008L | V | 0 | 1 | 1 |                    |   |
| CHL2516 | GD I   | Shanyou 82    | Jiaoling  | 2008L | V | 1 | 1 | 1 |                    |   |
| CHL2518 | GD II  | Yuxiang 88    | Longchuan | 2008L | V | 0 | 1 | 1 |                    |   |
| CHL2534 | GD II  | Shanyou 122   | Meixian   | 2008L | V | 1 | 1 | 1 |                    |   |
| CHL2547 | GD II  | Tianyou 368   | Fengshun  | 2008L | V | 1 | 1 | 1 |                    |   |
| CHL2549 | GD II  | Shanyou 122   | Dapu      | 2008L | V | 0 | 1 | 1 |                    |   |
| CHL2551 | GD II  | Boyoyun 3     | Zijin     | 2008L | V | 3 | 3 | 3 | D <sup>37-38</sup> | ✓ |
| CHL2560 | GD III | Huanghuazhan  | Boluo     | 2008L | A | 3 | 3 | 3 |                    | ✓ |
| CHL2561 | GD II  | Longyou 665   | Fougang   | 2008L | V | 0 | 1 | 1 |                    |   |
| CHL2563 | GD III | Zhanzinuo     | Huidong   | 2008L | V | 2 | 2 | 2 |                    | ✓ |
| CHL2570 | GD II  | Yesizhan      | Longmen   | 2008L | V | 3 | 3 | 3 | D <sup>37-38</sup> | ✓ |
| CHL2581 | GD II  | Qiuyou 452    | Qingxin   | 2008L | V | 1 | 0 | 1 |                    |   |
| CHL2584 | GD II  | Zayounuo      | Huaiji    | 2008L | V | 1 | 1 | 1 |                    |   |
| CHL2586 | GD II  | Zhengguizhong | Yingde    | 2008L | A | 3 | 3 | 3 |                    | ✓ |



|                                       |        |                |           |       |   |   |   |   |                                   |           |
|---------------------------------------|--------|----------------|-----------|-------|---|---|---|---|-----------------------------------|-----------|
| CHL2593                               | GD II  | Qiuyou 3008    | Yunfu     | 2008L | V | 1 | 0 | 1 |                                   |           |
| CHL2600                               | GD II  | Qiuyou 3008    | Deqing    | 2008L | V | 1 | 0 | 1 |                                   |           |
| CHL2604                               | GD III | Guinongzhan    | Haifeng   | 2008L | V | 1 | 1 | 1 |                                   |           |
| CHL2606                               | GD III | Xiaonongzhan   | Zhuhai    | 2008L | A | 3 | 3 | 3 |                                   | ✓         |
| CHL2608                               | GD III | Taiwanyouzhan  | Yangchun  | 2008L | V | 1 | 3 | 1 |                                   | ✓         |
| CHL2615                               | GD III | Bo II You 15   | Lianjiang | 2008L | V | 1 | 1 | 1 |                                   | ✓         |
| CHL2626                               | GD III | Longyou 673    | Xinyi     | 2008L | V | 1 | 1 | 1 |                                   |           |
| CHL2631                               | GD III | Shanyou 3550   | Gaozhou   | 2008L | V | 3 | 3 | 3 | D <sup>37-38</sup> , T201C (S67S) | ✓         |
| CHL2636                               | GD IV  | Bo II You 15   | Suixi     | 2008L | V | 1 | 1 | 1 |                                   |           |
| <b>Hunan (HN) population (V/3: 8)</b> |        |                |           |       |   |   |   |   |                                   | <b>30</b> |
| EHL0312                               | HN I   | Tefu No.7      | Taoyuan   | 2007  | V | 1 | 1 | 1 |                                   |           |
| EHL0313                               | HN I   | Tefu No.7      | Taoyuan   | 2007  | A | 3 | 3 | 3 |                                   | ✓         |
| EHL0314                               | HN II  | Weiyu 402      | Anren     | 2007  | V | 3 | 3 | 3 | D <sup>37-38</sup>                | ✓         |
| EHL0317                               | HN II  | Weiyu 402      | Anren     | 2007  | V | 4 | 4 | 4 | D <sup>39-66</sup> , A120G (P40P) | ✓         |
| EHL0319                               | HN II  | Liangyou 287   | Liling    | 2007  | V | 1 | 3 | 1 |                                   | ✓         |
| EHL0321                               | HN II  | V402           | Hengnan   | 2007  | V | 3 | 3 | 3 | D <sup>37-38</sup>                | ✓         |
| EHL0323                               | HN II  | V233           | Hengdong  | 2007  | V | 3 | 3 | 3 | D <sup>37-38</sup>                | ✓         |
| EHL0324                               | HN II  | I You 402      | Hengdong  | 2007  | V | 3 | 3 | 3 | D <sup>37-38</sup>                | ✓         |
| EHL0326                               | HN II  | I You 402      | Hengnan   | 2007  | V | 3 | 3 | 3 | D <sup>37-38</sup> , C207T (S69S) | ✓         |
| EHL0327                               | HN II  | Zhuliangyou 30 | Dongan    | 2007  | V | 1 | 1 | 1 |                                   |           |
| EHL0329                               | HN II  | Douyuanyou 299 | Dongan    | 2007  | V | 1 | 1 | 1 | G136A (E46K)                      | ✓         |
| EHL0330                               | HN II  | T You 99       | Dongan    | 2007  | V | 1 | 1 | 1 |                                   | ✓         |
| EHL0331                               | HN II  | Xianfeng 501   | Dongan    | 2007  | V | 1 | 1 | 1 |                                   |           |
| EHL0337                               | HN II  | Jinyou 71      | Dongan    | 2007  | V | 2 | 2 | 2 |                                   | ✓         |
| EHL0338                               | HN II  | Jinyou 898     | Dongan    | 2007  | V | 0 | 0 | 0 |                                   |           |
| EHL0339                               | HN II  | Nongping 001   | Dongan    | 2007  | V | 2 | 2 | 2 |                                   | ✓         |
| EHL0340                               | HN II  | Weiyu 507      | Dongan    | 2007  | V | 0 | 0 | 0 |                                   |           |

|         |        |                 |          |      |   |   |   |   |                                                              |   |
|---------|--------|-----------------|----------|------|---|---|---|---|--------------------------------------------------------------|---|
| EHL0341 | HN II  | Weiyou 298      | Dongan   | 2007 | V | 3 | 3 | 3 | D <sup>37-38</sup>                                           | ✓ |
| EHL0342 | HN II  | Weiyou 463      | Dongan   | 2007 | V | 4 | 4 | 4 | D <sup>39-66</sup> , G90C (K30N), A120G (P40P), G123A (K41K) | ✓ |
| EHL0345 | HN II  | T You 213       | Dongan   | 2007 | V | 1 | 1 | 1 |                                                              |   |
| EHL0346 | HN II  | T You 103       | Dongan   | 2007 | V | 1 | 3 | 1 |                                                              | ✓ |
| EHL0348 | HN II  | Jinyou 103      | Dongan   | 2007 | V | 2 | 2 | 2 |                                                              | ✓ |
| EHL0349 | HN II  | Jinyou 402      | Dongan   | 2007 | V | 1 | 1 | 1 |                                                              |   |
| EHL0350 | HN II  | Xianfeng No.1   | Dongan   | 2007 | V | 0 | 1 | 1 |                                                              |   |
| EHL0353 | HN II  | Nongfengyou 909 | Dongan   | 2007 | V | 1 | 1 | 1 |                                                              |   |
| EHL0354 | HN II  | Jinyou 821      | Dongan   | 2007 | V | 0 | 1 | 1 |                                                              |   |
| EHL0355 | HN II  | Weiyou 463      | Dongan   | 2007 | V | 1 | 1 | 1 |                                                              |   |
| EHL0356 | HN II  | Zhongyou No.1   | Dongan   | 2007 | V | 1 | 1 | 1 |                                                              |   |
| EHL0360 | HN II  | Zhongyou No.1   | Dongan   | 2007 | V | 1 | 3 | 1 |                                                              | ✓ |
| EHL0361 | HN II  | Zhuliangyou 02  | Dongan   | 2007 | V | 1 | 3 | 1 |                                                              | ✓ |
| EHL0363 | HN II  | Xiangnuo        | Dongan   | 2007 | A | 3 | 3 | 3 |                                                              | ✓ |
| EHL0364 | HN II  | T You 706       | Dongan   | 2007 | V | 0 | 1 | 1 |                                                              |   |
| EHL0365 | HN II  | Zhongyou 493    | Dongan   | 2007 | A | 3 | 3 | 3 |                                                              | ✓ |
| EHL0367 | HN II  | Jinyou 463      | Dongan   | 2007 | V | 1 | 1 | 1 |                                                              |   |
| EHL0368 | HN II  | Zhuliangyou 83  | Dongan   | 2007 | V | 0 | 1 | 1 |                                                              |   |
| EHL0369 | HN III | Jinyou 899      | Daoxian  | 2007 | V | 1 | 1 | 1 |                                                              |   |
| EHL0370 | HN III | Jinyou 463      | Daoxian  | 2007 | V | 0 | 0 | 0 |                                                              |   |
| EHL0372 | HN III | Nuogu           | Daoxian  | 2007 | V | 0 | 0 | 0 |                                                              |   |
| EHL0373 | HN III | Jinyou 463      | Daoxian  | 2007 | V | 1 | 1 | 1 |                                                              |   |
| EHL0374 | HN III | Shennongdao 101 | Daoxian  | 2007 | A | 3 | 3 | 3 |                                                              | ✓ |
| EHL0377 | HN I   | Jing No.5       | Yiyang   | 2007 | V | 1 | 3 | 1 |                                                              | ✓ |
| EHL0378 | HN I   | Wanxiang No. 13 | Taojiang | 2007 | A | 3 | 3 | 3 |                                                              | ✓ |
| EHL0379 | HN I   | Pin No. 3       | Taojiang | 2007 | V | 0 | 1 | 1 |                                                              |   |
| EHL0380 | HN I   | Wannuo          | Yiyang   | 2007 | V | 1 | 1 | 1 |                                                              |   |
| EHL0381 | HN I   | Wannuo          | Yiyang   | 2007 | A | 3 | 3 | 3 |                                                              | ✓ |

|                                          |       |                    |           |      |   |   |   |   |                                   |           |
|------------------------------------------|-------|--------------------|-----------|------|---|---|---|---|-----------------------------------|-----------|
| EHL0382                                  | HN I  | Nuogu              | YueYang   | 2007 | V | 0 | 0 | 0 |                                   |           |
| EHL0385                                  | HN II | II You 58          | Liuyang   | 2007 | V | 0 | 1 | 1 |                                   |           |
| EHL0386                                  | HN II | Minghui 63         | Liuyang   | 2007 | V | 1 | 1 | 1 |                                   |           |
| EHL0387                                  | HN II | II You 838         | Liuyang   | 2007 | V | 1 | 1 | 1 |                                   |           |
| EHL0393                                  | HN II | Y NO. 232          | Youxian   | 2007 | V | 1 | 1 | 1 |                                   |           |
| EHL0394                                  | HN II | Xinshanyou 64      | Anren     | 2007 | V | 4 | 4 | 4 | D <sup>39-66</sup> , A120G (P40P) | ✓         |
| EHL0395                                  | HN IV | Zhongyou 288       | Huaihua   | 2007 | A | 3 | 3 | 3 |                                   | ✓         |
| EHL0963                                  | HN I  | Xianghuayou No. 7  | Taojiang  | 2008 | V | 1 | 3 | 1 |                                   | ✓         |
| EHL0964                                  | HN I  | Xianghuayou No. 8  | Taojiang  | 2008 | V | 1 | 3 | 1 |                                   | ✓         |
| EHL0975                                  | HN I  | Fuyou II           | Taojiang  | 2008 | V | 3 | 3 | 3 | D <sup>37-38</sup>                | ✓         |
| EHL0979                                  | HN II | Mixiang No.1       | Changsha  | 2008 | V | 3 | 3 | 3 | D <sup>37-38</sup>                | ✓         |
| EHL0982                                  | HN II | Xiangwanxian No.17 | Changsha  | 2008 | V | 0 | 0 | 0 |                                   |           |
| EHL0988                                  | HN II | Chaojidao 527      | Zhuzhou   | 2008 | V | 1 | 1 | 1 |                                   |           |
| EHL0989                                  | HN II | Xiangwanxian No.13 | Zhuzhou   | 2008 | V | 1 | 1 | 1 |                                   |           |
| EHL0990                                  | HN II | Xiangzaoxian No.24 | Liling    | 2008 | V | 0 | 1 | 1 |                                   |           |
| <b>Liaoning (LN) population (V/3: 0)</b> |       |                    |           |      |   |   |   |   |                                   | <b>18</b> |
| EHL0396                                  | LN I  | Minxi 12           | Zhuanghe  | 2006 | A | 3 | 3 | 3 |                                   |           |
| EHL0397                                  | LN I  | Chenhong 59        | Zhuanghe  | 2006 | V | 1 | 3 | 1 |                                   | ✓         |
| EHL0400                                  | LN I  | Lige               | Zhuanghe  | 2006 | A | 3 | 3 | 3 |                                   | ✓         |
| EHL0409                                  | LN I  | Yanjing 167        | Donggang  | 2006 | V | 1 | 1 | 1 |                                   | ✓         |
| EHL0412                                  | LN I  | Huanghai No.6      | Donggang  | 2006 | V | 1 | 1 | 1 |                                   |           |
| EHL0431                                  | LN I  | Liaodan 203        | Donggang  | 2006 | V | 1 | 1 | 1 |                                   |           |
| EHL0433                                  | LN I  | Liaohan 109        | Donggang  | 2006 | V | 1 | 1 | 1 |                                   | ✓         |
| EHL0444                                  | LN II | Chenhong 59        | Pulandian | 2006 | A | 3 | 3 | 3 |                                   | ✓         |
| EHL0445                                  | LN II | Minxi 12           | Pulandian | 2006 | V | 1 | 1 | 1 |                                   | ✓         |
| EHL0446                                  | LN II | Gangyu 129         | Pulandian | 2006 | V | 0 | 1 | 1 |                                   |           |
| EHL0447                                  | LN II | Koshihikari        | Pulandian | 2006 | A | 3 | 3 | 3 |                                   | ✓         |
| EHL0468                                  | LN II | Maoyang No.3       | Fengchen  | 2006 | V | 1 | 1 | 1 |                                   |           |

|         |        |                |           |      |   |   |   |   |   |
|---------|--------|----------------|-----------|------|---|---|---|---|---|
| EHL0471 | LN II  | Qiao 201-2     | Fengchen  | 2006 | V | 1 | 1 | 1 |   |
| EHL0472 | LN II  | Panjin 78-2    | Fengchen  | 2006 | V | 1 | 3 | 1 | ✓ |
| EHL0474 | LN II  | Chenhe No.1    | Fengchen  | 2006 | V | 1 | 1 | 1 |   |
| EHL0484 | LN II  | Yuanfeng No.9  | Fushun    | 2006 | V | 1 | 1 | 1 |   |
| EHL0486 | LN II  | Fuyou 504      | Fushun    | 2006 | V | 1 | 1 | 1 |   |
| EHL0489 | LN II  | Shennong 0705  | Fushun    | 2006 | A | 3 | 3 | 3 | ✓ |
| EHL0491 | LN II  | Jijing 88      | Fushun    | 2006 | A | 3 | 3 | 3 | ✓ |
| EHL0492 | LN II  | Xin No.2       | Fushun    | 2006 | V | 1 | 1 | 1 |   |
| EHL0493 | LN II  | Shennong 315   | Fushun    | 2006 | A | 3 | 3 | 3 | ✓ |
| EHL0496 | LN II  | Su 01-18       | Dashiqiao | 2006 | V | 1 | 1 | 1 |   |
| EHL0498 | LN II  | Yanfeng        | Dashiqiao | 2006 | V | 1 | 1 | 1 |   |
| EHL0499 | LN II  | Yanfeng 47-12  | Dashiqiao | 2006 | V | 1 | 1 | 1 |   |
| EHL0500 | LN III | Chenhe No.1    | Panjin    | 2006 | V | 1 | 1 | 1 |   |
| EHL0503 | LN III | Maoyang No.3   | Panjin    | 2006 | V | 1 | 3 | 1 |   |
| EHL0505 | LN III | Liaohu 12      | Panjin    | 2006 | V | 1 | 1 | 1 |   |
| EHL0509 | LN III | Yanjing 228    | Panjin    | 2006 | V | 0 | 1 | 1 |   |
| EHL0515 | LN III | Liaohu No.1    | Panjin    | 2006 | V | 1 | 1 | 1 |   |
| EHL0517 | LN III | Huadan 995     | Shenyang  | 2006 | V | 1 | 1 | 1 |   |
| EHL0519 | LN III | Huadan 995     | Tieling   | 2006 | V | 1 | 1 | 1 | ✓ |
| EHL0879 | LN I   | Liaoxing No.1  | Dandong   | 2007 | V | 0 | 0 | 0 |   |
| EHL0880 | LN I   | Gangyu No.2    | Dandong   | 2007 | V | 1 | 1 | 1 | ✓ |
| EHL0882 | LN I   | Chenhe No.1    | Dandong   | 2007 | V | 0 | 0 | 0 |   |
| EHL0883 | LN I   | Maoyang No.5   | Dandong   | 2007 | V | 1 | 1 | 1 |   |
| EHL0885 | LN I   | Liaojing No.9  | Dandong   | 2007 | V | 1 | 1 | 1 |   |
| EHL0916 | LN II  | Heixiangdao    | Dalian    | 2007 | V | 1 | 1 | 1 |   |
| EHL0917 | LN II  | Zhuangyan No.8 | Dalian    | 2007 | V | 1 | 1 | 1 |   |
| EHL0918 | LN II  | Koshihikari    | Dalian    | 2007 | V | 1 | 1 | 1 |   |
| EHL0919 | LN II  | Yanfeng 47     | Dalian    | 2007 | A | 3 | 3 | 3 | ✓ |

|                                       |       |               |          |      |   |   |   |   |                |
|---------------------------------------|-------|---------------|----------|------|---|---|---|---|----------------|
| EHL0921                               | LN II | Gangyuan No.8 | Dalian   | 2007 | V | 1 | 1 | 1 |                |
| EHL0922                               | LN II | Liaonong 06-7 | Qinyuan  | 2007 | V | 1 | 1 | 1 |                |
| EHL0924                               | LN II | Fu 9906       | Qinyuan  | 2007 | V | 0 | 0 | 0 |                |
| EHL0925                               | LN II | Fuxing 90     | Qinyuan  | 2007 | V | 1 | 1 | 1 |                |
| EHL0926                               | LN II | Jijing 88     | Qinyuan  | 2007 | V | 0 | 1 | 1 |                |
| EHL0927                               | LN II | Daohuaxiang   | Qinyuan  | 2007 | A | 3 | 3 | 3 |                |
| EHL0928                               | LN II | Liaonong 06-7 | Xinbin   | 2007 | A | 3 | 3 | 3 | ✓              |
| EHL0931                               | LN II | Jiudao 46     | Xinbin   | 2007 | A | 3 | 3 | 3 |                |
| EHL0932                               | LN II | Xinyu No.3    | Xinbin   | 2007 | A | 3 | 3 | 3 | ✓              |
| EHL0935                               | LN II | Jijing 88     | Xinbin   | 2007 | A | 3 | 3 | 3 |                |
| EHL0936                               | LN II | Shendao 37    | Xifeng   | 2007 | V | 1 | 1 | 1 |                |
| EHL0937                               | LN II | Shennong 315  | Xifeng   | 2007 | V | 1 | 1 | 1 |                |
| EHL0939                               | LN II | Xinyi No.3    | Xifeng   | 2007 | A | 3 | 0 | 3 | ✓              |
| EHL0940                               | LN II | Fuxing 90     | Xifeng   | 2007 | V | 1 | 1 | 1 |                |
| EHL0941                               | LN II | Xinyi No.3    | Kaiyuan  | 2007 | V | 1 | 1 | 1 |                |
| EHL0942                               | LN II | Shennong 9903 | Kaiyuan  | 2007 | V | 0 | 1 | 1 |                |
| EHL0943                               | LN II | Huadan No.995 | Kaiyuan  | 2007 | V | 1 | 1 | 1 |                |
| EHL0944                               | LN II | Fuxing 90     | Kaiyuan  | 2007 | V | 1 | 1 | 1 |                |
| EHL0961                               | LN IV | Chenhe No.1   | Suizhong | 2007 | V | 1 | 1 | 1 | T173C (V58A) ✓ |
| EHL0962                               | LN IV | Yanjing 218   | Suizhong | 2007 | V | 1 | 1 | 1 |                |
| <b>Jilin (JL) population (V/3: 0)</b> |       |               |          |      |   |   |   |   | <b>16</b>      |
| CHL678                                | JL I  | Tong 31       | Yongji   | 2003 | A | 3 | 3 | 3 |                |
| CHL680                                | JL I  | Ji 04         | Yongji   | 2003 | A | 3 | 3 | 3 |                |
| CHL682                                | JL I  | Tong 313      | Yongji   | 2003 | A | 3 | 3 | 3 | ✓              |
| CHL684                                | JL I  | Fengyou 201   | Yongji   | 2003 | A | 3 | 3 | 3 |                |
| CHL686                                | JL I  | Pingjing 1    | Yongji   | 2003 | A | 3 | 3 | 3 | ✓              |
| CHL688                                | JL I  | Jiu 01 C 6    | Yongji   | 2003 | A | 3 | 3 | 3 | ✓              |
| CHL690                                | JL I  | Changbai 9    | Shulan   | 2003 | A | 3 | 3 | 3 |                |

|        |       |                 |          |      |   |   |   |   |   |
|--------|-------|-----------------|----------|------|---|---|---|---|---|
| CHL692 | JL I  | Dongnong V 7    | Shulan   | 2003 | A | 3 | 3 | 3 |   |
| CHL693 | JL I  | Yan 312         | Shulan   | 2003 | A | 3 | 3 | 3 |   |
| CHL695 | JL I  | Songjing 6      | Shulan   | 2003 | A | 3 | 3 | 3 | ✓ |
| CHL697 | JL I  | 301             | Shulan   | 2003 | A | 3 | 3 | 3 | ✓ |
| CHL699 | JL I  | Tongyu 12       | Shulan   | 2003 | A | 3 | 3 | 3 |   |
| CHL700 | JL I  | Wuyou 1         | Shulan   | 2003 | A | 3 | 3 | 3 |   |
| CHL701 | JL I  | 99-35           | Panshi   | 2003 | A | 3 | 3 | 3 |   |
| CHL702 | JL I  | Tongfeng No. 3  | Panshi   | 2003 | A | 3 | 3 | 3 |   |
| CHL703 | JL I  | Ji 01-3628      | Panshi   | 2003 | A | 3 | 3 | 3 |   |
| CHL704 | JL I  | Pingjing No. 2  | Panshi   | 2003 | A | 3 | 3 | 3 |   |
| CHL705 | JL I  | Chang 6         | Panshi   | 2003 | A | 3 | 3 | 3 |   |
| CHL708 | JL IV | Tongjing 612    | Jiaohe   | 2003 | A | 3 | 3 | 3 |   |
| CHL710 | JL IV | Yan 313         | Jiaohe   | 2003 | A | 3 | 3 | 3 |   |
| CHL712 | JL IV | Changbai 9      | Jiaohe   | 2003 | A | 3 | 3 | 3 | ✓ |
| CHL714 | JL IV | Wuyou C         | Jiaohe   | 2003 | A | 3 | 3 | 3 |   |
| CHL715 | JL IV | Yannian No. 1   | Jiaohe   | 2003 | V | 0 | 1 | 1 |   |
| CHL716 | JL IV | Jiudao 16       | Jiaohe   | 2003 | V | 1 | 1 | 1 | ✓ |
| CHL718 | JL IV | Changlixiang 12 | Jiaohe   | 2003 | A | 3 | 3 | 3 | ✓ |
| CHL721 | JL I  | Jiu 01 D 13     | Jilin    | 2003 | A | 3 | 3 | 3 |   |
| CHL722 | JL I  | Ji T620-4       | Jilin    | 2003 | A | 3 | 3 | 3 |   |
| CHL724 | JL I  | T 02            | Jilin    | 2003 | V | 1 | 1 | 1 | ✓ |
| CHL725 | JL I  | Tongjing 790 B  | Jilin    | 2003 | V | 1 | 1 | 1 |   |
| CHL730 | JL I  | Tongnian 3      | Jilin    | 2003 | A | 3 | 3 | 3 |   |
| CHL731 | JL I  | Tongyu 308      | Jilin    | 2003 | A | 3 | 3 | 3 |   |
| CHL733 | JL I  | Tongnian 23     | Meihekou | 2003 | V | 1 | 1 | 1 | ✓ |
| CHL734 | JL I  | Tong 3158       | Liuhe    | 2003 | A | 3 | 3 | 3 |   |
| CHL735 | JL I  | Daliwang        | Liuhe    | 2003 | A | 3 | 3 | 3 | ✓ |
| CHL736 | JL I  | Unknown         | Lishu    | 2003 | A | 3 | 3 | 3 | ✓ |

|                                               |         |                 |             |      |   |   |   |   |           |
|-----------------------------------------------|---------|-----------------|-------------|------|---|---|---|---|-----------|
| CHL737                                        | JL I    | Unknown         | Yitong      | 2003 | A | 3 | 3 | 3 | ✓         |
| CHL739                                        | JL I    | 182             | Jiutai      | 2003 | V | 0 | 1 | 1 |           |
| CHL740                                        | JL I    | 183             | Jiutai      | 2003 | V | 0 | 1 | 1 |           |
| CHL741                                        | JL I    | No. 55          | Jiutai      | 2003 | V | 1 | 1 | 1 |           |
| CHL742                                        | JL I    | No. 55          | Jiutai      | 2003 | V | 1 | 1 | 1 |           |
| CHL743                                        | JL I    | No. 52          | Jiutai      | 2003 | V | 1 | 1 | 1 |           |
| CHL744                                        | JL I    | Tong 793        | Dehui       | 2003 | V | 1 | 1 | 1 | ✓         |
| CHL745                                        | JL I    | Tong 190        | Dehui       | 2003 | V | 1 | 1 | 1 |           |
| CHL746                                        | JL I    | Menggudao       | Dongfeng    | 2003 | A | 3 | 3 | 3 | ✓         |
| CHL748                                        | JL I    | Changxiangsi    | Dongfeng    | 2003 | A | 3 | 3 | 3 |           |
| CHL749                                        | JL I    | Tongjing 769    | Dongfeng    | 2003 | V | 1 | 1 | 1 |           |
| CHL751                                        | JL I    | Tongyin 58      | Dongfeng    | 2003 | A | 3 | 3 | 3 |           |
| CHL752                                        | JL I    | Zupei 11        | Dongfeng    | 2003 | A | 3 | 3 | 3 |           |
| CHL754                                        | JL I    | Chaochan 2      | Gongzhuling | 2003 | V | 1 | 1 | 1 |           |
| CHL755                                        | JL I    | Unknown         | Yitong      | 2003 | A | 3 | 3 | 3 |           |
| CHL756                                        | JL I    | Xueguang        | Yongji      | 2002 | A | 3 | 3 | 3 |           |
| CHL757                                        | JL IV   | Unknown         | Jiaohe      | 2002 | A | 3 | 3 | 3 |           |
| CHL759                                        | JL III  | Shangyu No. 397 | Helong      | 2002 | A | 3 | 3 | 3 | ✓         |
| CHL760                                        | JL I    | Menggudao       | Meihekou    | 2002 | A | 3 | 3 | 3 |           |
| CHL761                                        | JL I    | 403             | Liuhe       | 2002 | A | 3 | 3 | 3 |           |
| CHL762                                        | JL I    | 112             | Liuhe       | 2002 | A | 3 | 3 | 3 |           |
| CHL764                                        | JL I    | Tong 458        | Dongfeng    | 2002 | A | 3 | 3 | 3 |           |
| CHL765                                        | JL I    | Unknown         | Gongzhuling | 2002 | A | 3 | 3 | 3 |           |
| CHL766                                        | JL I    | Unknown         | Gongzhuling | 2002 | A | 3 | 3 | 3 |           |
| CHL767                                        | JL I    | 939             | Baichen     | 2002 | A | 3 | 3 | 3 |           |
| <b>Heilongjiang (HLJ) population (V/3: 0)</b> |         |                 |             |      |   |   |   |   | <b>18</b> |
| EHL0524                                       | HLJ III | Songjing 7      | Zhaoyuan    | 2006 | V | 1 | 1 | 1 | ✓         |
| EHL0527                                       | HLJ II  | Kendao 10       | Anqin       | 2006 | V | 1 | 1 | 1 |           |

|         |         |                 |            |      |   |   |   |   |                |
|---------|---------|-----------------|------------|------|---|---|---|---|----------------|
| EHL0532 | HLJ II  | Song 98-131     | Anqin      | 2006 | V | 1 | 1 | 1 |                |
| EHL0540 | HLJ I   | Songjing 10     | Achen      | 2006 | V | 1 | 1 | 1 | ✓              |
| EHL0547 | HLJ II  | Kendao 12       | Tonghe     | 2006 | V | 1 | 1 | 1 | ✓              |
| EHL0555 | HLJ II  | Kuyuku 131      | Tonghe     | 2006 | A | 3 | 3 | 3 |                |
| EHL0557 | HLJ II  | Suijing No.4    | Tonghe     | 2006 | A | 3 | 3 | 3 |                |
| EHL0559 | HLJ II  | Dongnong 220    | Shangzhi   | 2006 | A | 3 | 3 | 3 |                |
| EHL0560 | HLJ II  | Puyou 18        | Shangzhi   | 2006 | V | 1 | 1 | 1 |                |
| EHL0567 | HLJ II  | Wuyoudao No.3   | Shangzhi   | 2006 | A | 3 | 3 | 3 | ✓              |
| EHL0568 | HLJ II  | Wuyoudao No.3   | Shangzhi   | 2006 | A | 3 | 3 | 3 |                |
| EHL0570 | HLJ II  | Mudanjiang 19   | Shangzhi   | 2006 | A | 3 | 3 | 3 |                |
| EHL0571 | HLJ II  | Kendao 10       | Shangzhi   | 2006 | A | 3 | 3 | 3 |                |
| EHL0592 | HLJ II  | Shangyu 397     | Muling     | 2006 | A | 3 | 3 | 3 |                |
| EHL0598 | HLJ III | Punian No.7     | Hulin      | 2006 | A | 3 | 3 | 3 |                |
| EHL0599 | HLJ III | Kenjiandao No.6 | Hulin      | 2006 | A | 3 | 3 | 3 | ✓              |
| EHL0603 | HLJ III | Kuyuku 131      | Hulin      | 2006 | V | 1 | 1 | 1 |                |
| EHL0611 | HLJ III | Kendao 12       | Hulin      | 2006 | A | 3 | 3 | 3 |                |
| EHL0612 | HLJ II  | Kuyuku 131      | Mishan     | 2006 | A | 3 | 3 | 3 | ✓              |
| EHL0615 | HLJ II  | Suijing No.4    | Mishan     | 2006 | A | 3 | 3 | 3 |                |
| EHL0618 | HLJ II  | Kuyuku 131      | Mishan     | 2006 | A | 3 | 3 | 3 |                |
| EHL0621 | HLJ II  | Longdun 02-318  | Jidong     | 2006 | A | 3 | 3 | 3 | T160C (F54L) ✓ |
| EHL0624 | HLJ II  | Kuyuku 131      | Tangyuan   | 2006 | A | 3 | 3 | 3 | ✓              |
| EHL0625 | HLJ II  | Kuyuku 131      | Huachuan   | 2006 | V | 1 | 1 | 1 |                |
| EHL0629 | HLJ II  | Longdun 102     | Jiamusi    | 2006 | A | 3 | 3 | 3 | ✓              |
| EHL0632 | HLJ II  | Kuyuku 131      | Jiamusi    | 2006 | A | 3 | 3 | 3 |                |
| EHL0635 | HLJ II  | Kuyuku 131      | Baoqin     | 2006 | A | 3 | 3 | 3 | ✓              |
| EHL0636 | HLJ II  | Kuyuku 131      | Jixian     | 2006 | A | 3 | 3 | 3 |                |
| EHL0750 | HLJ I   | Kuyuku 131      | Mudanjiang | 2006 | A | 3 | 3 | 3 | ✓              |
| EHL0755 | HLJ II  | Kuyuku 131      | Tangyuan   | 2006 | A | 3 | 3 | 3 |                |



|         |         |               |              |      |   |   |   |   |                |
|---------|---------|---------------|--------------|------|---|---|---|---|----------------|
| EHL0757 | HLJ II  | Kendao No.6   | Tangyuan     | 2006 | A | 3 | 3 | 3 |                |
| EHL0764 | HLJ II  | Kendao No.11  | Qinan        | 2006 | A | 3 | 3 | 3 |                |
| EHL0766 | HLJ II  | Kuyuku 131    | Qinan        | 2006 | A | 3 | 3 | 3 | ✓              |
| EHL0770 | HLJ II  | Longjing 17   | Qinan        | 2006 | A | 3 | 3 | 3 |                |
| EHL0776 | HLJ I   | Kendao No.6   | Mudanjiang   | 2006 | A | 3 | 3 | 3 |                |
| EHL0779 | HLJ I   | Kuyuku 131    | Mudanjiang   | 2006 | A | 3 | 3 | 3 |                |
| EHL0781 | HLJ I   | Longjing 17   | Mudanjiang   | 2006 | A | 3 | 3 | 3 |                |
| EHL0787 | HLJ III | Kenjiandao 13 | Jiansanjiang | 2006 | A | 3 | 3 | 3 |                |
| EHL0790 | HLJ III | Kuyuku 131    | Jiansanjiang | 2006 | A | 3 | 3 | 3 | ✓              |
| EHL0794 | HLJ I   | Jite 639      | Wuchang      | 2007 | A | 3 | 3 | 3 |                |
| EHL0798 | HLJ III | Songjing 3    | Zhaodong     | 2007 | V | 0 | 1 | 1 |                |
| EHL0801 | HLJ III | Songjing 12   | Zhaodong     | 2007 | V | 1 | 1 | 1 |                |
| EHL0814 | HLJ III | Jijing 106    | Zhaodong     | 2007 | V | 1 | 1 | 1 |                |
| EHL0821 | HLJ I   | Songjing 5    | Shuangchen   | 2007 | V | 1 | 1 | 1 | T116C (V39A) ✓ |
| EHL0828 | HLJ I   | Songjing 6    | Shuangchen   | 2007 | V | 1 | 1 | 1 |                |
| EHL0830 | HLJ II  | Kendao 12     | Fangzheng    | 2007 | V | 1 | 1 | 1 |                |
| EHL0834 | HLJ I   | Menggudao     | Mudanjiang   | 2007 | A | 3 | 3 | 3 |                |
| EHL0835 | HLJ I   | Menggudao     | Mudanjiang   | 2007 | A | 3 | 3 | 3 | ✓              |
| EHL0836 | HLJ I   | Shangyu 397   | Mudanjiang   | 2007 | A | 3 | 3 | 3 |                |
| EHL0837 | HLJ I   | Shangyu 397   | Mudanjiang   | 2007 | A | 3 | 3 | 3 |                |
| EHL0849 | HLJ II  | Kuyuku 131    | Muling       | 2007 | A | 3 | 3 | 3 |                |
| EHL0850 | HLJ II  | Kuyuku 131    | Muling       | 2007 | A | 3 | 3 | 3 | ✓              |
| EHL0856 | HLJ II  | Puyou 9       | Muling       | 2007 | A | 3 | 3 | 3 |                |
| EHL0858 | HLJ II  | Puyou 9       | Muling       | 2007 | A | 3 | 3 | 3 |                |
| EHL0865 | HLJ III | Longjing 17   | Hulin        | 2007 | A | 3 | 3 | 3 |                |
| EHL0866 | HLJ III | Longjing 17   | Hulin        | 2007 | A | 3 | 3 | 3 |                |
| EHL0868 | HLJ III | Kenjiandao 10 | Hulin        | 2007 | A | 3 | 3 | 3 | ✓              |
| EHL0869 | HLJ III | Kenjiandao 10 | Hulin        | 2007 | A | 3 | 3 | 3 | ✓              |

|                                  |         |             |                  |      |   |   |   |   |
|----------------------------------|---------|-------------|------------------|------|---|---|---|---|
| EHL0870                          | HLJ III | Longjing 17 | Hulin            | 2007 | A | 3 | 3 | 3 |
| EHL0871                          | HLJ III | Longjing 17 | Hulin            | 2007 | A | 3 | 3 | 3 |
| Barley and weed derived isolates |         |             |                  |      |   |   |   |   |
| CHL1                             | N/A     | Barley      | Smoeng, Thailand | 1998 |   | 3 | 3 | 3 |
| CHL2                             | N/A     | Barley      | Smoeng, Thailand | 1998 |   | 3 | 3 | 3 |
| CHL27                            | N/A     | Weed        | Smoeng, Thailand | 1998 |   | 3 | 3 | 3 |
| CHL30                            | N/A     | Weed        | Smoeng, Thailand | 1998 |   | 3 | 3 | 3 |
| CHL31                            | N/A     | Weed        | Smoeng, Thailand | 1998 |   | 3 | 3 | 3 |
| CHL32                            | N/A     | Weed        | Smoeng, Thailand | 1998 |   | 3 | 3 | 3 |
| CHL325                           | N/A     | Weed        | Guangzhou, China | 2001 |   | 3 | 3 | 3 |
| CHL326                           | N/A     | Weed        | Guangzhou, China | 2001 |   | 3 | 3 | 3 |
| CHL329                           | N/A     | Weed        | Guangzhou, China | 2001 |   | 3 | 3 | 3 |
| CHL330                           | N/A     | Weed        | Guangzhou, China | 2001 |   | 3 | 3 | 3 |
| CHL331                           | N/A     | Weed        | Guangzhou, China | 2001 |   | 0 | 3 | 3 |
| CHL332                           | N/A     | Weed        | Guangzhou, China | 2001 |   | 0 | 3 | 3 |

5

✓

✓

✓

✓

✓

<sup>a</sup> The rice-growing areas in the respective provinces, China, were adopted from Regionalization of Rice Cropping in China Edited in 1988 by China National Rice Research Institute, Hangzhou, China. Abbreviations GD I and GD II mean #1 and #2 rice-growing areas, respectively, in Guangdong province and so on.

<sup>b</sup> 2008E and 2008L mean Early season (from March to July) and Late season (from July to November) in 2008, respectively and so on.

<sup>c</sup> PCR product-based genotypes 0, 1, 2, 3, and 4, respectively, indicate none, highest, second higher, normal, and double binds of *AvrPib* products (also see Fig. 2).

<sup>d</sup> D<sup>37-38</sup>, deletion at A37T38; A137G, SNP at #137 position and so on.

<sup>e</sup> Isolates being phenotypes/genotypes of both the major ones (V/1 and A/3) were subjected to selective resequencing, those being other three ones (V/2, V/3, and V/4) were all subjected to resequencing. A, avirulent; V, virulent, MV, moderately virulent.
